# Supplementary material for: Conditional deletion of MAD2B in forebrain neurons enhances hippocampus-dependent learning and memory in mice
Source: Front Cell Neurosci. 2022 Sep 23;16:956029. doi: 10.3389/fncel.2022.956029 (PMC9538151; doi:10.3389/fncel.2022.956029)
Supplement: Supplementary file 2 [file Table_1.xlsx]

## Sheet: Figure 1
Figure 1
D relative MAD2B mRNA expression level
hippocampus								cortex
WT	CKO		n=3					WT	CKO		n=3
1.0152	0.370755		df=4					1.03005	0.338157		Welch-corrected t=4.272
1.06188	0.411762		t=14.310					1.00336	0.38749		df=2.094
0.923147	0.395044		p=0.0001					0.966619	0.719945		p=0.0467
F relative MAD2B protein expression level
hippocampus								cortex
WT	cKO		n=3					WT	CKO		n=3
1.0713	0.076649		df=2.192					0.941575	0.145694		t=6.943
0.948307	0.620321		Welch-corrected t=4.136					1.16382	0.379934		df=4
0.980392	0.167558		p=0.0459					0.894606	0.236798		p=0.0023
H
cortex				CA1				DG				CA3
WT	cKO	n=3		WT	cKO	n=3		WT	cKO	n=3		WT	cKO	n=3
1.00229	0.349938	df=4		1.00503	0.532553	df=4		1.0623	0.69501	df=4		0.988871	0.87653	df=4
0.942224	0.312163	t=27.69		0.97601	0.420221	t=14.95		1.01546	0.712212	t=10.61		1.00874	0.899497	t=4.907
0.95549	0.354865	p<0.0001		1.01896	0.483064	p=0.0001		0.97392	0.738386	p=0.0004		1.00239	0.939541	P=0.008

## Sheet: Figure 2
D
Atf4				Cort				Rab3b				Mthfr
WT	cKO	n=3		WT	cKO	n=3		WT	cKO	n=3		WT	cKO	n=3
1.043	0.636489	df=4		0.903395	0.449694	df=4		0.998995	0.375315	df=4		0.988629	1.35315	df=4
1.03902	0.71489	t=4.930		1.71144	0.619409	t=3.125		1.27016	0.503348	t=5.712		0.9292	1.53308	t=8.831
0.917982	0.78143	p=0.0079		1.16097	0.365124	p=0.0354		1.27621	0.636401	p=0.0046		0.915454	1.47852	p=0.0009

## Sheet: Figure 3
D
Atf4				Cort				Rab3b				Camk2a
WT	cKO	n=3		WT	cKO	n=3		WT	cKO	n=3		WT	cKO	n=3
1.11609	0.624749	df=4		1.05664	0.283258	df=4		1.07382	0.528622	df=4		1.05421	1.32407	df=4
1.16796	0.740129	t=9.942		1.06703	0.532173	t=6.322		1.13322	0.801009	t=4.106		0.796374	1.53316	t=4.334
1.12714	0.751309	p=0.0006		0.8763	0.368155	p=0.0032		1.10084	0.813641	p=0.0148		0.905137	1.28809	p=0.0123

## Sheet: Figure 4
A
WT																		cKO													Significant?	P value	Mean of WT	Mean of cKO	Difference	SE of difference	t ratio	df	Adjusted P Value
24.73	8.35	24.96	43.92	13.81	60.06	20.05	20.75	59.83	60.06	21.45	59.92	30.81	19.81	6.94	60.06			12.56	58.89	13.66	10.45	21.61	35.33	15.83	14.19	4.14	15.85	59.37	26.6		No	0.215359	33.47	24.04	9.429	7.425	1.27	26	>0.999999
8.3	16.13	35.26	29.41	7.93	55.05	59.88	23.29	59.87	59.87	9.18	42.81	8.6	8.19	60.01	59.89			40.67	20.44	10.48	11.47	14.2	18.02	54.06	10.96	5.13	17.55	10.03	59.9		No	0.169941	33.98	22.74	11.24	7.961	1.412	26	0.849703
4.92	60.06	16.85	31.99	12.64	59.9	12.25	59.9	59.88	57.75	19.62	21.51	16.9	18.27	12.37	59.89			38.76	12.52	10.48	11.92	16.72	14.95	49.61	18.91	34.74	59.98	11.7	59.91		No	0.584199	32.79	28.35	4.444	8.019	0.5542	26	>0.999999
20.98	40.6	19.41	17.31	6.98	58.03	8.93	28.39	21.19	57.72	28.12	29.25	20.35	12.39	32.9	19.26			6.94	6.55	5.98	10.53	13.18	11.7	55.53	59.9	15.83	28.55	6.53	8.87		No	0.274362	26.36	19.17	7.189	6.438	1.117	26	>0.999999
15.22	22.63	16.54	18.41	23.09	32.61	23.87	27.92	20.2	34.16	15.05	42.9	19.74	9.9	10.22	15.37			8.42	15.92	11.15	8.82	13.03	17.48	10.69	7.49	3.51	17.94	4.76	17.55		Yes	0.001388	21.74	11.4	10.34	2.89	3.579	26	0.00694
B
WT																		cKO
604.181	164.247	491.045	1116.36	245.59	926.922	419.776	271.342	1100.64	1197.2	356.682	950.679	488.867	430.724	162.252	1143.77			216.004	1249.23	280.213	265.897	405.205	846.515	466.171	1756.81	163.576	403.913	1785.05	656.68		Significant?	P value	Mean of WT	Mean of cKO	Difference	SE of difference	t ratio	df	Adjusted P Value
192.83	467.691	714.873	733.618	171.531	951	1032.06	306.736	1020.88	1124.18	780.183	646.329	1147.67	327.12	1414.79	397.723			959.534	532.626	210.935	303.351	297.432	483.747	681.317	1551.96	744.043	317.422	1097.55	196.159		No	0.668932	629.4	707.9	-78.55	181.6	0.4325	26	>0.999999
143.009	1474.45	278.127	792.751	302.691	416.541	1141.7	1004.12	203.296	442.383	1152.56	194.999	149.044	410.077	1496.13	1388.05			954.881	296.635	208.595	309.229	265.035	329.866	603.549	680.346	438.875	1051.92	440.158	1415.24		No	0.514324	714.3	614.7	99.65	150.7	0.6612	26	>0.999999
475.777	922.795	346.452	470.31	176.589	562.34	243.886	542.077	334.615	1176.57	491.106	236.722	295.841	300.651	879.414	499.374			173.243	129.077	163.864	272.337	267.064	329.856	1530.59	1772.83	408.463	554.197	208.949	239.849		No	0.55712	686.9	582.9	104	174.9	0.5948	26	>0.999999
396.101	476.921	313.017	429.955	526.69	638.748	494.322	435.922	363.059	616.626	301.329	635.509	356.472	219.393	261.266	295.33			225.916	292.25	183.924	234.627	180.797	459.656	240.954	154.676	126.301	463.633	193.496	237.889		No	0.965002	497.2	504.2	-7.036	158.8	0.0443	26	>0.999999
																															Yes	0.001106	422.5	249.5	173	47.18	3.667	26	0.00553
C					D					F
WT	CKO				WT	cKO				WT	cKO
14.29	23.17	n1=16,n2=12			1	4	n1=16,n2=12			209.791	221.652	n1=16,n2=12
20.36	11.92	df=26			3	1	df=26			202.065	153.295	df=26
8.67	11.94	t=0.8415			2	3	t=3.082			159.287	190.294	t=0.8484
11.22	24.11	p=0.4077			3	6	p=0.0048			118.134	254.618	p=0.4040
10.77	15.89				3	3				188.301	139.256
28.55	17.08				1	6				202.616	217.579
17.79	14.99				1	1				183.722	237.988
12.4	19.19				2	4				176.55	139.316
19.66	13.59				0	3				232.054	270.274
12.41	15.43				1	2				124.761	141.199
13.57	28.5				4	6				250.128	131.762
22.69	16.13				2	3				150.95	243.781
9.83					1					190.812
21.29					1					219.134
18.95					3					137.968
12.41					1					143.109
G					H					I
WT	cKO				WT	cKO				WT	cKO
22.8	25.61	n1=16,n2=12			65.1986	42.132	n1=16,n2=12			63.5372	74.0921	n1=16,n2=12
28.42	40.69	df=26			73.5653	58.319	df=26			62.8083	85.2019	df=26
32.47	46.96	t=0.2301			61.7209	62.0528	t=0.9076			74.168	70.4338	t=2.087
27.01	38.32	p=0.8198			55.9792	67.667	p=0.3724			63.1298	78.4301	p=0.0468
54.39	69.57				84.0743	26.9081				55.6146	73.9236
45.39	57.68				59.5117	58.9459				72.522	82.1773
67.4	99.8				32.7057	56.493				67.6887	74.9457
35.54	84.58				55.4509	51.407				63.7818	62.8659
92.57	40.71				62.3063	31.972				63.4046	49.0383
107.23	65.28				51.211	50.4517				65.108	78.0926
16.13	74.5				47.2291	62.7651				73.3551	61.9173
109.65	59.06				51.5367	53.8943				58.0578	55.4084
83.2					45.1788					69.3891
119.99					61.28					54.8633
18.81					41.0929					49.4242
121.72					51.5921					57.6874
J
trial	WT														CKO										Sidak's multiple comparisons test	Mean Diff.	95.00% CI of diff.	Significant?	Summary	Adjusted P Value		N1	N2	t	DF		ANOVA table	SS	DF	MS	F (DFn, DFd)	P value
hab	2.66667	3.55	0.883333	1.78333	24.8833	0.883333	8.88333	6.21667	8	4.45	0.883333	9.66667			9.78333	1.78333	12.45	8	4.45	6.21667	1.78333	5.33333	9.78333		WT - CKO												Interaction	330.7	4	82.67	F (4, 76) = 0.4746	P=0.7543
1	4.45	6.21667	15.1167	34.6667	61.35	13.3333	19.5667	26.6667	41	8	16.9	10.6667			38.2333	0.883333	41	34.7667	25	49.7833	3.65	25	25.8833		Row 1	-0.5579	-7.171 to 6.055	No	ns	0.9998		12	9	0.2425	17.69		Time	51173	4	12793	F (2.949, 56.04) = 73.44	P<0.0001
2	31.1167	41.7833	50.9833	39.4167	69.65	33.7833	17.7833	77.65	74.9833	56.9	37.3333	34.9667			58.6833	18.6667	53.4167	45.4167	48.3167	27.9833	22.2333	45.4667	72.4333		Row 2	-5.639	-26.64 to 15.36	No	ns	0.9498		12	9	0.7719	17.67		Column Factor	8.75	1	8.75	F (1, 19) = 0.01582	P=0.9012
3	71.1333	62.7333	38.7333	41.85	50.6833	25.7833	32	78.2333	63.55	78.7333	44.45	57.4			57.2833	48.0167	54.5167	85.1833	55.1167	27.5667	44.5167	73.3333	68.9667		Row 3	3.572	-19.52 to 26.66	No	ns	0.9956		12	9	0.4439	18		Subject	10511	19	553.2	F (19, 76) = 3.176	P=0.0002
4	64.0167	66.6833	88.0167	76.4667	88.0167	70.2333	64.0167	76.4667	68.4667	90.6833	58.6833	34.6667			76.4667	80.0167	73.7333	84.4667	52.45	60.45	28.45	92.1833	58.6833		Row 4	-3.393	-25.32 to 18.53	No	ns	0.9956		12	9	0.4448	17.73		Residual	13239	76	174.2
																									Row 5	3.101	-20.09 to 26.29	No	ns	0.9976		12	9	0.3932	14.87
K
WT	CKO
97.07	53.33	n1=12,n2=9
108.8	133.33	df=11.07
50.13	147.2	Welch-corrected t=2.684,
70.4	265.54	p=0.0212
122.14	173.87
117.87	106.67
108.27	131.2
97.07	134.41
85.33	146.67
101.87
74.13
26.13

## Sheet: Figure 5
B
Cortex				CA1				CA3				DG
WT	cKO			WT	cKO			WT	cKO			WT	cKO
0.977938	1.03377	n=4		0.804954	1.24458	n=4		1.16233	1.29058	n=4		0.944882	1.28234	n=4
1.02656	1.04097	df=6		1.10836	1.35604	df=6		0.921844	1.2505	df=6		0.985377	1.23734	df=6
0.990545	1.06258	t=3.856		0.928793	1.14551	t=2.845		1.03407	1.21844	t=2.224		0.922385	1.13836	t=1.693
1.00495	1.04998	p=0.0084		1.15789	1.32508	p=0.0294		0.881764	1.01804	P=0.0678		1.14736	0.949381	P=0.1413

## Sheet: Figure 6
B
WT	cKO	n=3
0.991744	1.38844	df=4
1.04133	1.48762	t=7.236
0.96695	1.31406	p=0.0019

## Sheet: Figrue 7
C	WT
10	4	4	5	7	3	5	1	2	3	3	5	1	1	6	4	5	5	5	4	4	4	6	1	5	2	6	5	7	4	2	4	3	2	1	3	6	5	2	3	1	3	2	4	3	5	7	6	5	3
20	6	5	5	8	6	5	5	10	6	6	8	4	3	8	12	9	6	9	8	5	10	9	3	10	11	7	10	9	5	5	4	6	7	5	4	12	11	5	8	7	10	7	4	3	6	8	5	6	10
30	7	8	8	14	10	9	11	6	9	8	12	11	3	9	10	11	11	14	10	9	17	12	9	9	9	15	11	10	9	8	8	9	7	8	14	15	22	8	14	14	12	7	9	3	8	10	8	14	14
40	14	12	15	14	13	17	19	12	10	13	16	9	6	11	15	14	11	19	12	13	20	20	17	15	13	15	19	15	17	14	13	15	14	11	11	16	13	10	17	19	16	11	9	9	11	13	9	16	13
50	14	23	20	14	16	13	21	11	10	14	15	16	12	11	14	13	21	24	17	19	21	22	16	22	19	21	18	20	14	16	11	17	16	21	17	23	19	14	17	16	12	15	9	12	19	16	12	19	16
60	15	19	20	20	11	23	21	15	15	15	24	22	12	13	13	17	18	27	17	21	25	28	13	21	20	25	21	25	19	16	22	15	23	16	23	31	20	18	20	20	17	19	16	10	23	14	16	15	19
70	14	21	21	22	14	13	22	19	18	19	29	14	13	15	14	16	23	21	20	16	19	28	20	23	26	24	27	24	17	23	25	17	17	20	21	29	22	21	26	27	25	19	14	12	31	25	21	20	17
80	19	23	25	24	15	33	21	24	15	19	20	18	22	19	15	19	26	22	24	22	21	30	17	31	21	29	28	27	24	28	26	17	27	19	21	32	20	18	19	34	16	26	14	21	26	30	23	24	22
90	28	26	32	22	24	26	24	25	21	33	21	18	17	23	23	19	24	25	22	22	23	28	22	32	21	31	32	27	28	22	24	24	23	18	22	32	15	27	23	27	18	16	17	19	34	31	26	27	28
100	25	22	24	29	29	32	25	25	18	23	25	22	18	23	22	18	25	29	22	26	24	31	18	26	20	29	30	26	27	28	34	26	19	31	21	24	25	31	26	22	26	24	23	17	35	25	25	32	40
110	23	27	28	25	21	30	27	21	16	23	20	25	17	22	17	19	23	26	22	29	25	27	17	30	16	27	28	22	26	20	29	21	27	26	19	25	15	27	25	18	26	22	25	16	34	28	20	24	36
120	34	19	22	19	25	28	24	24	14	21	13	26	14	21	16	18	15	26	27	35	22	29	22	36	22	30	25	18	27	19	25	22	25	25	21	18	16	23	25	20	29	24	25	22	37	23	33	28	30
130	29	18	24	21	21	22	22	27	15	32	12	16	17	20	15	13	21	23	22	33	21	26	22	35	22	25	27	23	25	21	25	20	23	25	25	22	20	24	20	15	27	17	19	18	38	33	20	26	41
140	27	13	22	14	20	25	25	20	12	19	13	14	14	20	8	14	14	14	23	33	20	24	19	39	21	26	28	21	25	23	24	22	24	22	24	13	9	26	20	15	29	19	20	18	36	26	26	22	31
150	24	13	27	5	25	24	25	18	11	21	11	11	7	17	6	11	14	15	25	36	23	26	20	34	22	24	23	19	25	17	19	22	20	20	18	16	9	24	23	11	23	22	21	19	37	33	25	31	29
160	27	10	23	3	16	20	12	12	8	19	11	11	5	16	5	9	10	8	20	31	27	24	15	32	11	16	15	18	23	21	15	13	17	21	17	10	12	19	18	11	17	18	14	13	33	30	22	26	14
170	21	12	11	2	18	13	13	9	9	9	12	8	6	7	3	6	8	10	16	25	26	13	11	26	14	25	19	14	18	21	9	14	13	23	16	4	8	14	10	10	17	17	14	18	27	28	20	28	15
180	19	7	10	2	14	16	9	6	6	8	9	8	5	7	6	5	4	7	17	18	18	7	13	21	11	19	10	12	13	15	12	9	11	16	17	6	11	10	9	10	14	15	13	11	15	25	11	16	13
190	18	6	4	1	8	14	9	4	5	9	10	2	3	8	5	5	3	7	14	16	19	4	8	17	8	7	8	14	12	10	4	6	10	11	12	4	7	9	16	6	10	10	10	13	16	28	7	13	5
200	13	5	5	1	9	12	6	3	5	10	8	10	3	9	1	3	2	4	14	16	14	4	9	12	9	7	5	12	8	6	1	5	5	11	16	5	11	5	14	4	6	7	9	8	10	20	3	9	8
210	12	4	4	1	5	7	3	2	4	7	6	6	2	6	3	5	2	4	14	15	10	5	4	12	4	5	3	7	4	2	1	4	6	8	9	5	7	8	4	2	3	7	8	10	7	28	1	9	4
220	9	3	4	1	5	5	3	1	2	3	3	3	3	8	3	4	1	2	12	13	6	5	4	9	3	4	3	8	4	1	1	3	4	5	8	5	4	7	7	2	2	5	5	8	5	13	1	3	2
230	6	2	2	1	3	5	1	1	2	2	2	2	2	6	2	3	1	2	12	14	2	4	2	2	1	4	2	6	3	1	1	3	5	6	6	5	3	4	4	1	4	3	7	6	6	11	1	2	2
240	5	2	3	1	2	2	1	2	2	1	2	2	3	5	2	4	1	1	11	9	1	4	1	3	1	2	1	6	3	1	1	4	5	3	4	3	3	1	2	1	2	4	4	8	4	7	1	1	1
250	4	2	2	0	1	3	1	2	2	1	1	1	2	4	1	4	1	1	11	9	1	3	1	1	1	2	1	4	3	1	1	4	3	1	1	3	3	1	1	1	1	2	4	8	1	3	1	1	1
260	3	2	2	0	1	1	1	2	1	1	1	1	1	2	1	2	1	1	11	5	1	3	0	1	2	2	1	2	2	1	1	2	2	2	1	5	1	1	1	1	1	1	6	5	1	1	1	1	1
270	3	1	2	0	1	1	1	2	0	1	1	1	1	2	1	2	1	1	8	4	1	0	0	1	2	2	1	2	2	1	0	1	1	2	1	2	1	1	1	0	1	1	3	2	1	2	1	1	1
280	1	1	2	0	1	1	1	2	0	1	1	1	1	3	1	2	1	2	5	5	1	0	0	1	1	1	1	3	2	0	0	1	1	2	1	1	1	1	1	0	1	1	2	2	1	1	1	1	0
290	1	1	0	0	1	1	1	2	0	1	1	1	1	1	1	1	1	2	3	3	1	0	0	0	1	1	1	1	2	0	0	1	1	2	1	1	1	0	1	0	1	1	3	2	1	1	1	1	0
300	1	0	0	0	1	1	0	0	0	1	1	0	0	1	1	1	0	2	1	2	1	0	0	0	1	1	1	1	2	0	0	1	1	2	1	1	0	0	0	0	0	0	4	2	1	1	0	1	0
Bonferroni's multiple comparisons test	Mean Diff.	95.00% CI of diff.	Significant?	Summary	Adjusted P Value		N1	N2	t	DF
WT - CKO
Row 1	-0.4778	-1.657 to 0.7019	No	ns	>0.9999		50	36	1.319	78.12
Row 2	0.5233	-1.118 to 2.164	No	ns	>0.9999		50	36	1.038	79.56		ANOVA table	SS	DF	MS	F (DFn, DFd)	P value
Row 3	-0.9622	-3.483 to 1.558	No	ns	>0.9999		50	36	1.247	71.89		Interaction	1268	29	43.71	F (29, 2436) = 2.724	P<0.0001
Row 4	-0.4056	-2.597 to 1.786	No	ns	>0.9999		50	36	0.6022	79.93		Time	214413	29	7394	F (4.761, 399.9) = 460.7	P<0.0001
Row 5	-1.028	-3.916 to 1.861	No	ns	>0.9999		50	36	1.163	70.37		Column Factor	464.4	1	464.4	F (1, 84) = 2.429	P=0.1229
Row 6	-3.207	-6.826 to 0.4126	No	ns	0.15		50	36	2.903	66.95		Subject	16063	84	191.2	F (84, 2436) = 11.91	P<0.0001
Row 7	-1.889	-5.570 to 1.792	No	ns	>0.9999		50	36	1.679	69.16		Residual	39096	2436	16.05
Row 8	-3.489	-7.189 to 0.2113	No	ns	0.0878		50	36	3.078	73.34
Row 9	-2.521	-6.496 to 1.454	No	ns	>0.9999		50	36	2.083	63.88
Row 10	-3.02	-7.516 to 1.476	No	ns	0.9188		50	36	2.217	57.03
Row 11	-3.649	-8.207 to 0.9094	No	ns	0.3176		50	36	2.645	55.84
Row 12	-2.879	-7.673 to 1.916	No	ns	>0.9999		50	36	1.972	63.54
Row 13	-2.908	-7.994 to 2.179	No	ns	>0.9999		50	36	1.877	63.7
Row 14	-1.97	-6.946 to 3.006	No	ns	>0.9999		50	36	1.294	71.21
Row 15	-1.107	-6.856 to 4.643	No	ns	>0.9999		50	36	0.6296	69.91
Row 16	-1.221	-6.612 to 4.170	No	ns	>0.9999		50	36	0.7405	70.95
Row 17	-0.06	-4.892 to 4.772	No	ns	>0.9999		50	36	0.0405	75.18
Row 18	0.5678	-3.220 to 4.355	No	ns	>0.9999		50	36	0.4908	68.45
Row 19	0.5533	-3.270 to 4.376	No	ns	>0.9999		50	36	0.4726	73.01
Row 20	0.3989	-3.553 to 4.351	No	ns	>0.9999		50	36	0.3327	58.48
Row 21	0.6911	-2.536 to 3.918	No	ns	>0.9999		50	36	0.6984	75.62
Row 22	0.31	-2.230 to 2.850	No	ns	>0.9999		50	36	0.401	63.22
Row 23	0.3778	-1.643 to 2.398	No	ns	>0.9999		50	36	0.6096	75.77
Row 24	0.2967	-1.447 to 2.041	No	ns	>0.9999		50	36	0.5566	69.2
Row 25	0.3989	-1.019 to 1.817	No	ns	>0.9999		50	36	0.9153	80.5
Row 26	0.32	-0.8457 to 1.486	No	ns	>0.9999		50	36	0.8924	82.29
Row 27	0.15	-0.9625 to 1.262	No	ns	>0.9999		50	36	0.444	60.02
Row 28	0.24	-0.5597 to 1.040	No	ns	>0.9999		50	36	0.9816	69.98
Row 29	0.08333	-0.7158 to 0.8825	No	ns	>0.9999		50	36	0.3459	52.03
Row 30	0.08111	-0.5907 to 0.7529	No	ns	>0.9999		50	36	0.3962	64.52
E
stubby				mushroom				long				filopodia
WT	cKO			WT	cKO			WT	cKO			WT	cKO
1.28776	1.41503	n1=71, n2=65		1.10379	4.24508	n1=71, n2=65		2.75948	1.41503	n1=71, n2=65		0.919828	4.24508	n1=71, n2=65
0.337741	1.26077	df=134		0.675482	2.94179	df=134		1.85757	2.10128	df=134		2.8708	2.94179	df=134
0.70673	2.07254	t=0.2519		1.64904	5.52677	t=5.319		1.64904	4.14508	Welch-corrected t=3.060		2.59135	2.07254	t=0.8285
0.243516	0.790202	p=0.8015		2.9222	5.53141	p<0.0001		2.19165	1.9755	p=0.0027		1.21758	1.9755	p=0.4089
1.89883	1.6735			1.32918	3.76538			1.89883	0.83675			3.03813	0.83675
0.410155	1.72734			0.820311	2.59101			2.46093	2.80693			3.6914	2.80693
0.520409	2.16685			0.867348	2.4764			1.04082	2.16685			2.77551	1.8573
0.6844	2.15119			1.3688	2.58142			1.59693	3.4419			1.3688	2.15118
0.863763	1.56101			1.29564	4.29277			1.51159	1.56101			2.37535	2.34151
0.405927	0.422208			1.21778	2.11104			1.42074	4.64429			2.43556	3.79987
2.88101	3.1837			1.72861	3.50207			1.15241	1.59185			2.30481	2.86533
0.717824	2.79556			0.717824	1.67734			1.43565	1.11822			2.39275	1.11822
1.44196	1.92963			1.08147	3.21605			2.88392	3.21605			1.44196	2.57284
0.691491	1.34391			0.518618	2.15025			2.24735	1.07512			2.59309	1.61269
0.796242	2.38601			0.796242	1.90881			4.77745	0.477202			2.38872	1.43161
0.860363	1.84094			2.15091	1.84094			3.01127	1.05197			2.15091	1.31496
1.00817	2.21822			3.52858	1.10911			2.01633	1.66366			1.00817	1.38639
0.632531	1.97402			1.58133	1.18441			2.53012	1.57922			1.58133	1.97402
0.952744	2.079			1.58791	1.386			1.90549	5.54401			1.58791	4.158
1.7298	1.79115			0.864902	3.13452			1.7298	2.23894			1.51358	3.13451
0.859599	1.54472			0.859599	4.11925			1.14613	3.60435			2.5788	1.54472
1.67182	0.246481			0.835911	2.46481			2.08978	2.7113			3.7616	3.20426
2.22457	1.42963			2.78071	1.42963			2.22457	2.57334			3.893	1.71556
1.51381	1.82224			2.01842	1.82224			1.51381	2.73336			2.77533	4.10004
0.670961	1.34348			0.33548	3.1348			2.68384	1.34348			4.02576	1.79131
2.0326	0.93006			1.62608	4.6503			2.43912	4.6503			2.43912	1.39509
1.54991	3.54076			2.16987	2.21298			2.16987	3.09817			2.78983	2.65557
1.82043	0.628358			1.09226	3.45597			1.09226	1.57089			3.27678	3.45597
1.43308	2.29772			2.38846	2.29772			1.91077	2.29772			1.91077	2.29772
1.63726	2.45868			2.04658	2.45868			1.63726	2.73187			2.4559	1.36593
3.4877	2.51931			3.10017	4.19886			1.55009	2.51931			3.4877	5.03863
1.77636	2.71592			3.55271	2.71592			1.77636	4.52653			3.10862	3.62122
3.85592	1.72632			1.60663	5.17896			1.92796	1.72632			1.92796	3.45264
3.07085	2.03004			3.07085	3.24807			1.75477	2.43605			3.07085	4.06009
4.43525	3.33768			2.46403	3.03426			1.97122	2.12398			2.95683	2.12398
3.26904	1.02877			3.26904	3.08631			2.33503	1.3717			3.26904	3.08631
2.31203	2.56855			2.31203	3.85282			2.77444	3.85282			2.77444	3.85282
2.47295	4.69539			2.47295	2.93462			2.47295	2.34769			1.5456	1.76077
3.2059	2.77797			2.40442	5.55594			4.80885	2.77797			4.40811	2.77797
3.33611	1.20501			2.22408	2.41003			2.22408	2.00835			6.11621	2.8117
3.34485	1.59473			4.45981	2.65788			2.78738	1.59473			4.45981	3.18945
2.29684	2.14179			3.67495	1.71343			2.75621	2.14179			5.51243	2.57014
2.05973	1.57866			1.37315	3.55198			1.71644	4.73597			2.74631	2.36799
1.3488	3.0739			2.0232	5.53301			2.0232	1.84434			2.6976	1.22956
1.86454	2.80951			3.26295	3.27777			1.86454	2.80951			2.79681	2.34126
2.44389	1.30913			3.25852	3.05463			1.22195	2.61826			2.44389	3.05463
3.66569	1.65317			3.66569	2.06646			3.20748	2.06646			2.74927	3.71962
1.36302	1.4632			3.63471	1.95093			2.72603	1.95093			3.18037	2.1948
1.33036	0.808113			1.66295	3.63651			2.66072	3.63651			2.66072	3.63651
0.922041	0.401687			3.22714	2.81181			1.84408	2.81181			3.68817	3.61518
3.25279	2.09529			1.85874	2.09529			1.39405	2.93341			1.39405	2.09529
1.46763	2.06704			1.67729	2.75605			0.838645	1.37803			1.88695	2.06704
2.64655	3.06654			1.98491	3.9427			2.31573	1.75231			2.97737	1.75231
2.79968	1.4916			2.33307	1.78992			2.33307	2.9832			1.39984	1.19328
2.21621	0.787061			1.77297	3.54177			1.77297	1.96765			1.77297	1.57412
1.46893	2.64648			3.42751	3.70508			2.93786	3.17578			2.44822	2.11719
2.35449	1.44513			4.23809	2.89026			1.88359	2.31221			1.88359	1.44513
2.03368	0.551055			2.84715	4.40844			1.62694	3.30633			2.44041	1.65317
1.75972	0.60551			1.75972	3.02755			1.25694	3.63306			1.75972	0.60551
3.32793	1.44238			2.91193	6.4907			2.49594	2.16357			3.32793	3.60594
1.01399	3.11565			3.54898	3.73878			2.53498	3.11565			3.04198	1.24626
1.41255	2.50501			3.67263	7.01403			1.41255	3.50701			1.41255	2.00401
2.46027	1.52532			1.47616	2.5422			2.95232	2.5422			1.47616	3.55908
2.16403	1.2945			2.16403	2.3301			1.44269	1.5534			3.60672	1.8123
0.834794	1.86192			0.834794	3.32134			1.66959	3.32134			5.00877	2.76778
2.26629				1.69972				1.13314				2.26629
1.34542				1.34542				1.88359				1.61451
0.633894				1.58474				1.26779				2.85252
2.64912				3.53216				1.76608				2.64912
1.86341				2.32926				1.86341				1.86341
2.97118				2.97118				0.330131				0.330131
H
total				spine				shaft
WT	CKO			WT	CKO			WT	CKO
0.408	0.276	n=29		0.3	0.204	n=29		0.108	0.072	n=29
0.132	0.312	df=48.07		0.108	0.264	df=56		0.024	0.048	df=56
0.24	0.336	Welch-corrected t=1.231		0.192	0.288	t=3.044		0.048	0.048	t=4.028
0.168	0.348	p=0.2242		0.108	0.312	p=0.0035		0.06	0.036	p=0.0002
0.276	0.3			0.18	0.24			0.096	0.06
0.288	0.36			0.228	0.312			0.06	0.048
0.336	0.396			0.3	0.348			0.036	0.048
0.276	0.372			0.228	0.336			0.048	0.036
0.324	0.324			0.276	0.252			0.048	0.072
0.228	0.384			0.192	0.336			0.036	0.048
0.252	0.396			0.168	0.336			0.084	0.06
0.276	0.492			0.204	0.456			0.072	0.036
0.336	0.384			0.228	0.336			0.108	0.048
0.24	0.372			0.168	0.216			0.072	0.156
0.396	0.396			0.336	0.348			0.06	0.048
0.504	0.408			0.396	0.36			0.108	0.048
0.336	0.348			0.24	0.324			0.096	0.024
0.372	0.228			0.312	0.18			0.06	0.048
0.264	0.384			0.18	0.372			0.084	0.012
0.276	0.3			0.204	0.264			0.072	0.036
0.408	0.3			0.3	0.252			0.108	0.048
0.348	0.408			0.276	0.372			0.072	0.036
0.456	0.324			0.408	0.312			0.048	0.012
0.312	0.24			0.276	0.204			0.036	0.036
0.348	0.324			0.216	0.312			0.132	0.012
0.444	0.288			0.324	0.276			0.12	0.012
0.228	0.324			0.144	0.252			0.084	0.072
0.372	0.276			0.276	0.252			0.096	0.024
0.444	0.384			0.288	0.348			0.156	0.036
[truncated: 37 more columns]

## Sheet: suppymentary figure 1
suppymentary figure 1
A				B				C				D
WT	cKO			WT	cKO			WT	cKO			WT	cKO
20161.5	38693.1	n1=16, n2=12		122.31	152.287	n1=16, n2=12		408.08	368.37	n1=16, n2=12		12.36	32.25	n1=16, n2=12
45130.6	44228.7	df=26		149.727	148.225	df=26		304.24	312.5	df=26		39.9	18.82	df=26
44223.2	45747.8	t=0.5340		156.277	154.789	t=0.9100		312.06	255.95	t=0.9555		19.29	46.72	t=1.259
26731.6	29370.8	p=0.5979		128.388	117.955	P=0.3712		360.69	365.05	P=0.3481		22.85	11.06	P=0.2191
31764.8	35494.8			132.735	134.797			311.73	285.62			18.44	35.88
36936.2	46820			143.241	146.226			320.3	302.88			28.12	30.08
37522.9	43816.1			151.418	150.524			307.68	293.46			28.4	24.68
38279.4	38789.9			147.894	139.869			318.58	327.53			24.3	29.85
31251.1	25105.3			134.448	134.253			319.53	344.59			11.26	19.2
36058.3	11809.9			142.958	109.149			306.55	410.52			49.43	9.6
21859.9	17148.4			121.255	111.738			425.99	330.61			7.92	26.68
35389.6	46600.9			135.665	80.1709			351.17	293.46			16.48	68.7
31286.4				143.469				355.65				16.17
26731.4				115.371				329.74				28.29
25048				122.025				388.42				13.08
44542.4				159.012				304.37				31.5
E				F					G
WT	cKO			WT	cKO				WT	CKO
13.5267	12.62	n1=16, n2=12		61.295	52.4933	n1=16, n2=12			1.70333	0.843333	n1=15, n2=12
17.77	15.06	df=26		44.5283	34.2267	df=26			1.37667	1.18333	df=25
11.5033	15.545	t=1.121		64.0267	60.2017	Welch-corrected t=0.3657			1.11333	1.79333	t=1.833
25.3783	24.015	P=0.2727		46.7317	41.4533	P=0.7198			2.85667	0.93	P=0.0787
14.2983	20.015			47.5817	31.5633				3.94	0.873333
10.9567	24.3817			65.47	45.765				4	1.98667
15.755	1.01			55.99	85.34				4.51	2.20333
13.3717	20.8533			69.47	46.1133				4.01333	3.76
19.1383	6.33			53.7817	80.6533				3.44333	2.27
30.29	1.09			44.0333	94.95				5	2.81333
13.8967	10.1433			57.0267	75.3467				4.09333	5
12.3117	23.0117			71.48	53.1133				4.14667	3.43667
12.24				71.1467					2.41333
19.0767				52.5267					2.77667
22.8483				45.755					1.89333
29.7083				45.895

## Sheet: suppymentary figure 2
B
cortex				CA1				CA3				DG
WT	cKO			WT	cKO			WT	cKO			WT	cKO
0.857143	1.07143	n=4		0.97992	1.06024	n=4		0.916201	1.00559	n=4		0.921811	0.888889	n=4
1.21429	1.14286	df=6		1.04418	1.10843	df=6		0.960894	0.938547	df=6		1.08642	0.773663	df=6
1.14286	0.928571	t=0.6124		0.97992	1.06024	t=2.035		1.07263	1.05028	t=0.5510		1.00412	1.02058	t=1.446
0.785714	1.14286	P=0.5628		0.995984	0.995984	P=0.0881		1.05028	0.893855	p=0.6015		0.987654	0.954733	p=0.1982
D
cortex				CA1				CA3				DG
WT	cKO			WT	cKO			WT	cKO			WT	cKO
0.958333	1.1875	n=4		1.15702	1.15702	n=4		0.911392	1.21519	n=4		0.881356	0.677966	n=4
0.916667	1.22917	df=6		0.694215	0.991736	df=6		0.860759	1.31646	df=6		1.01695	0.949153	df=6
1.22917	1.27083	t=1.357		1.22314	1.12397	t=0.6575		1.21519	1.11392	t=1.612		1.08475	0.881356	t=0.7939
0.895833	0.916667	p=0.2237		0.92562	1.05785	p=0.5353		1.01266	1.01266	p=0.1580		1.01695	1.15254	p=0.4575
